# Supplementary material
Source: HighWire-hosted journal article supplement (https://www.life-science-alliance.org/content/2/2/e201900323/F13)

Raw figure for Figure 9

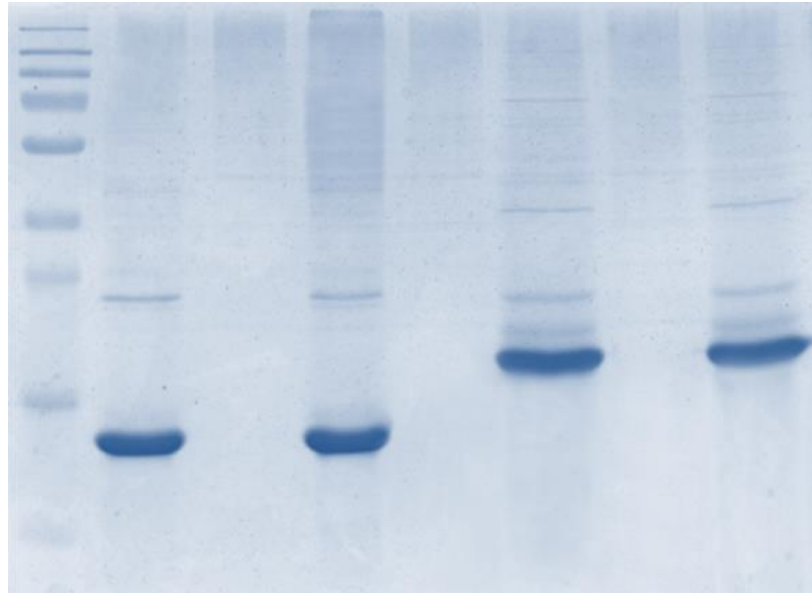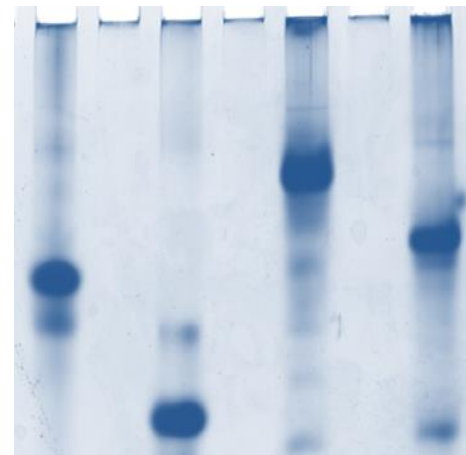

Supplement: inline-supplementary-material-10 [file inline-supplementary-material-10.pdf]
